# Supplementary material for: First Evidence of Past and Present Interactions between Viruses and the Black Soldier Fly, Hermetia illucens
Source: MDPI journal article supplement (doi:10.3390/v14061274), 2022-06-11
Supplement: s1 [file s1]

**Table S1 Details of primers used to amplify regions of the TotiEVE T1 (HITE) on chromosome 1 of BSFs.**

| Primer              | Sequence                                                             | Region on BSF genome (bp) | Target on TotiEVE                             | Expected PCR product size (bp) | Annealing temperature (°C) |
|---------------------|----------------------------------------------------------------------|---------------------------|-----------------------------------------------|--------------------------------|----------------------------|
| HITEHNE F & R       | 5'-GTT GTA ATC GGG AAT TTG GC-3' & 5'-GAA TGT GAA TAG AAA CTC CGC-3' | 97,213,374 – 97,214,373   | Host sequence outside EVE                     | ~1000                          | 52                         |
| HITEP F & R         | 5'-AAC AAA ATG TCG CAA CAA GG-3' & 5'-TAC AGA ATA TCC CAG AGT GC-3'  | 97,212,055 – 97,213,054   | POL ORF end of TotiEVE                        | ~1000                          | 50                         |
| HITE F & R          | 5'-TTA TAA AGG TAC CGC TGG AC-3' & 5'-TGC TTA TCT ATT GGG CTA GC-3'  | 97,211,454 – 97,212,021   | RdRP-like domain                              | ~568                           | 50                         |
| HITEG F & R         | 5'-ACT CAT GAT CGA AAA GGA CTC-3' & 5'-TTT CCA AAA CAT CGA TCT GC-3' | 97,206,252 – 97,207,251   | GAG ORF end of TotiEVE                        | ~1000                          | 50                         |
| HITEHNE F & HITEP R | 5'-GTT GTA ATC GGG AAT TTG GC-3' & 5'-TAC AGA ATA TCC CAG AGT GC-3'  | 97,212,055 – 97,214,373   | Host sequence outside EVE to POL ORF          | ~2300*                         | 52                         |
| HITEHNE F & HITE R  | 5'-GTT GTA ATC GGG AAT TTG GC-3' & 5'-TGC TTA TCT ATT GGG CTA GC-3'  | 97,211,454 – 97,214,373   | Host sequence outside EVE to RdRP-like domain | ~2900*                         | 52                         |

\*extension time was changed from 1 minute to 3 minutes.

**Table S4 Abbreviations of virus names or accepted virus species names of those used in phylogenetic trees and paper.**

| NCBI Accession | Virus species/name                               | Paper abbreviation* |
|----------------|--------------------------------------------------|---------------------|
| AB555544       | Omono River virus                                | OmRV                |
| GQ342961       | Drosophila melanogaster totivirus SW-2009a       | DmTV SW-2009a       |
| EU715328       | Armigeres subalbatus virus SaX06-AK20            | AsTV SaX06 (AK20)   |
| AY570982       | Penaeid shrimp infectious myonecrosis virus      | IMNV                |
| BK061373       | Hermetia illucens Toti-like virus 1              | HiTV1               |
| NC025218       | Leptopilina boulardi Toti-like virus             | LbTV                |
| MH213243       | Linepithema humile toti-like virus 1             | LhTV1               |
| MH727531       | Solenopsis midden virus                          | SoMiV               |
| NC032851       | Shuangao toti-like virus                         | ShoTV               |
| HQ158596       | Tuber aestivum virus 1                           | TaV1                |
| NC003745       | Saccharomyces cerevisiae virus L-A L1            | ScV L-A (L1)        |
| KY207365       | Puccinia striiformis totivirus 5                 | PsTV5               |
| NC028480       | Red clover powdery mildew-associated totivirus 1 | RPaTV1              |
| NC029096       | Panax notoginseng virus A                        | PnV-A               |
| KC610514       | Scheffersomyces segobiensis virus L              | SsV-L               |
| NC028481       | Red clover powdery mildew-associated totivirus 2 | RPaTV2              |
| U01060         | Saccharomyces cerevisiae virus L-BC La           | ScV L-BC (La)       |
| JN997472       | Xanthophyllomyces dendrorhous virus L1A          | XdV-L1A             |
| JN997473       | Xanthophyllomyces dendrorhous virus L1B          | XdV-L1B             |
| LC075489       | Red clover powdery mildew-associated totivirus 4 | RPaTV4              |
| NC028483       | Red clover powdery mildew-associated totivirus 3 | RPaTV3              |

|          |                                                  |          |
|----------|--------------------------------------------------|----------|
| KY207361 | <i>Puccinia striiformis</i> totivirus 1          | PsTV1    |
| KY207363 | <i>Puccinia striiformis</i> totivirus 3          | PsTV3    |
| KY207362 | <i>Puccinia striiformis</i> totivirus 2          | PsTV2    |
| KY207364 | <i>Puccinia striiformis</i> totivirus 4          | PsTV4    |
| NC028485 | Red clover powdery mildew-associated totivirus 5 | RPaTV5   |
| NC028486 | Red clover powdery mildew-associated totivirus 6 | RPaTV6   |
| NC028488 | Red clover powdery mildew-associated totivirus 7 | RPaTV7   |
| LC075493 | Red clover powdery mildew-associated totivirus 8 | RPaTV8   |
| KX148550 | <i>Anopheles</i> totivirus                       | AtoV     |
| NC027212 | <i>Camponotus yamaokai</i> virus                 | CYV      |
| NC029312 | <i>Camponotus nipponicus</i> virus               | CNV      |
| NC029302 | Piscine myocarditis-like virus                   | PMCLV    |
| DQ238861 | <i>Giardia canis</i> virus                       | GcV      |
| NC003555 | <i>Giardia lamblia</i> virus                     | GLV      |
| AF356189 | <i>Eimeria brunetti</i> RNA virus 1              | EbRV1    |
| KU597305 | <i>Eimeria stiedai</i> RNA virus 1               | EsRV1    |
| NC026140 | <i>Eimeria tenella</i> RNA virus 1               | EtRV1    |
| HE588147 | <i>Aspergillus foetidus</i> slow virus 1         | AfSV1    |
| NC003607 | <i>Helminthosporium victoriae</i> virus 190S     | HvV190S  |
| NC014823 | <i>Tolypocladium cylindrosporum</i> virus 1      | TcV1     |
| NC021565 | <i>Rosellinia necatrix</i> victorivirus 1        | RnVV1    |
| NC005074 | <i>Helicobasidium mompa</i> totivirus 1-17       | HmTV1-17 |
| NC006367 | <i>Magnaporthe oryzae</i> virus 1                | MoV1     |
| M92355   | <i>Leishmania</i> RNA virus 1                    | LRV1     |
| U32108   | <i>Leishmania</i> RNA virus 2                    | LRV2     |
| AF127178 | <i>Trichomonas vaginalis</i> virus 2             | TvV2     |
| AF325840 | <i>Trichomonas vaginalis</i> virus 3             | TvV3     |
| HQ607522 | <i>Trichomonas vaginalis</i> virus 4             | TvV4     |
| NC027701 | <i>Trichomonas vaginalis</i> virus 1             | TvV1     |

\*Abbreviations used were for convenience as some viruses do not have official abbreviations.

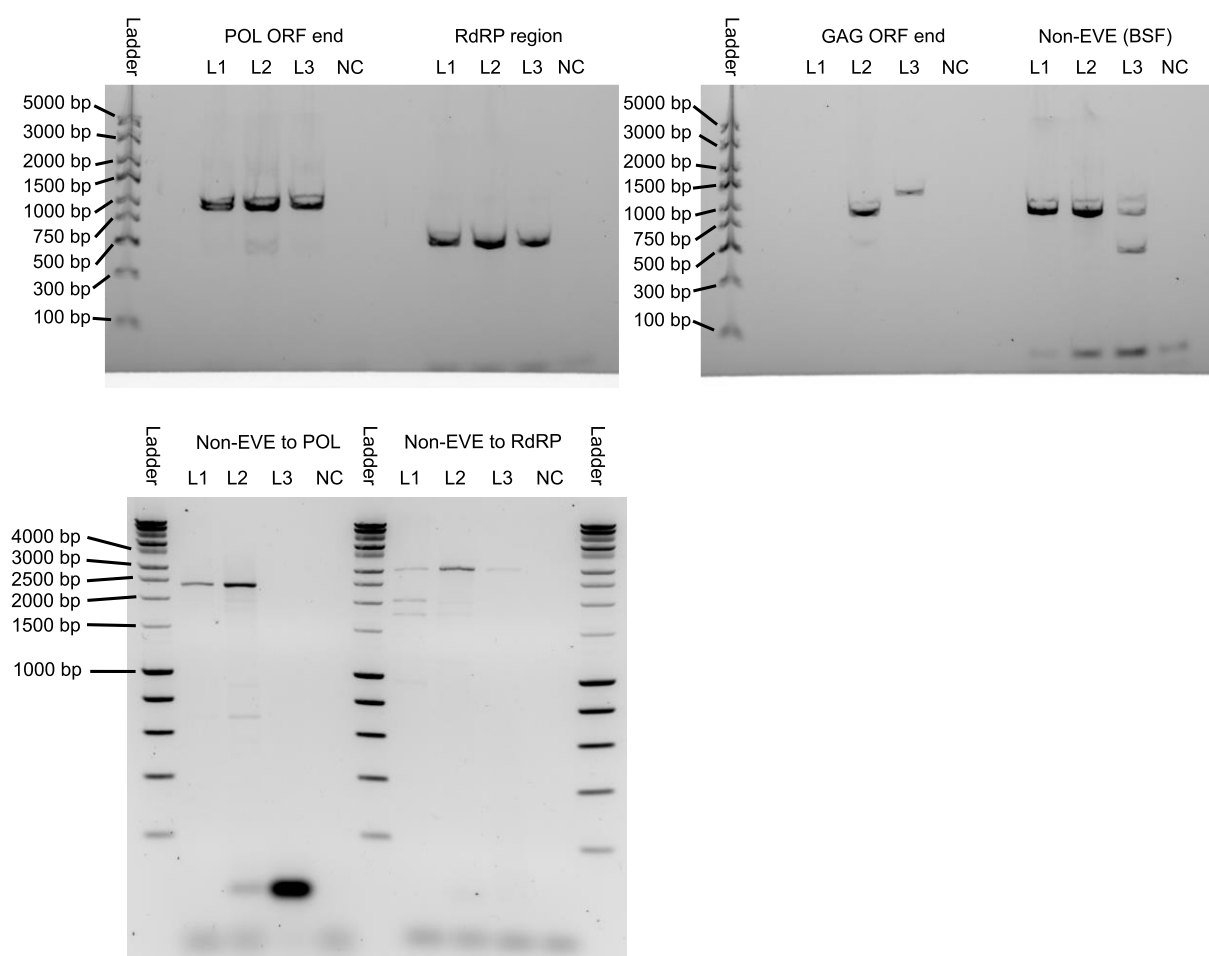

**Figure S1 PCR validation of the integration of TotiEVE and expressed TotiEVE-ST within the genome of BSF larvae (L1, L2, L3) originating from three independant rearing facilities.** (Top) Primers designed amplified short fragments (~1 kb), firstly at either extremity of the TotiEVE integration site on chromosome 1 according to the 5' to 3' orientation of the HiTV1 polymerase (POL) and capsid encoding (GAG) ORFs. Secondly a shorter fragment (~0.5 kb) to cover the region of the RdRP conserved domain-like sequence appearing in BSF transcriptomes and a region of BSF non-viral related sequence, which was outside of the alignment spanned by the HiTV1 contig, near the GAG ORF-like region of the TotiEVE integration. (Bottom) Primer HITEHNE F was used with HITEP R and HITE R to amplify fragments which overlapped the non-EVE BSF flanking sequence with the TotiEVE POL and RdRP ORFs. These fragments were migrated on a 1.2% agarose gel and were sized according to the SmartLadder (MW-1700-10, Eurogentec, Liège, Belgium ). Positive bands on the gel demonstrate that the TotiEVE fragments in Larval L1 to L3 are indeed integrated in the BSF genome.



**Table S3** List of sequences resulting from study and related transcriptome list. (a) contigs of H1TV1 which are longer than 5000 nt in length in cDNA and RNA forms. (b) short transcripts which contained/mapped to the RdRp 4-like conserved domain detected in BSF transcriptomes and closely related to TotiEVE site T1. (c) Sequences of short PCR amplified products which targeted different regions of TotiEVE site T1. (d) Sequences of EVE candidates obtained from BGA1, 2 and 3. (e) Regions of BSF genome which flanked the sites on the genome where the sequences of EVE candidates could map. (f) List of transcripts where contigs mapped to H1TV1 contig 1.

[illegible]

[illegible]



[illegible]



[illegible]



[illegible]





f

List of transcriptomes where contigs mapped to HITV1 contig 1:

|             |            |
|-------------|------------|
| SRR14339796 | SRR8242285 |
| SRR14339795 | SRR8242284 |
| SRR14339794 | SRR8242283 |
| SRR14339793 | SRR8242282 |
| SRR14339791 | SRR8242281 |
| SRR14339790 | SRR8242280 |
| SRR14339789 | SRR8242279 |
| SRR14339788 | SRR8242277 |
| SRR14339787 | SRR6656088 |
| SRR14339786 | SRR6656087 |
| SRR14339785 | ERR1801998 |
| SRR14339784 | ERR1801997 |
| SRR14339783 | ERR1801996 |
| SRR14339782 | ERR1801995 |
| SRR10233312 | ERR1801994 |
| SRR10158821 | ERR1801993 |
| SRR8242297  | ERR1801992 |
| SRR8242293  | ERR1801991 |
| SRR8242292  | ERR1801990 |
| SRR8242291  | ERR1801989 |
| SRR8242289  | ERR1801988 |
| SRR8242288  | ERR1801987 |
| SRR8242287  | ERR1801986 |
| SRR8242286  | ERR1801985 |
